# Supplementary material
Source: ML conference proceedings conference paper supplement (https://proceedings.neurips.cc/paper_files/paper/2018/hash/8b5700012be65c9da25f49408d959ca0-Abstract.html)
Supplement: Supplementary file [file 8b5700012be65c9da25f49408d959ca0-Supplemental.zip]

---

# Learning to Optimize Tensor Programs: Supplementary Materials

---

## A Supplementary Materials

### A.1 Additional Experimental Results

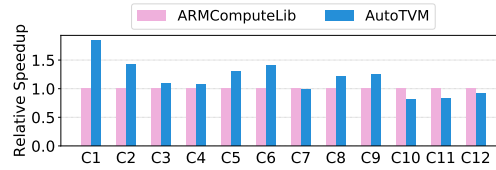

Figure 1: Single Operator Performance on Mali T860MP4

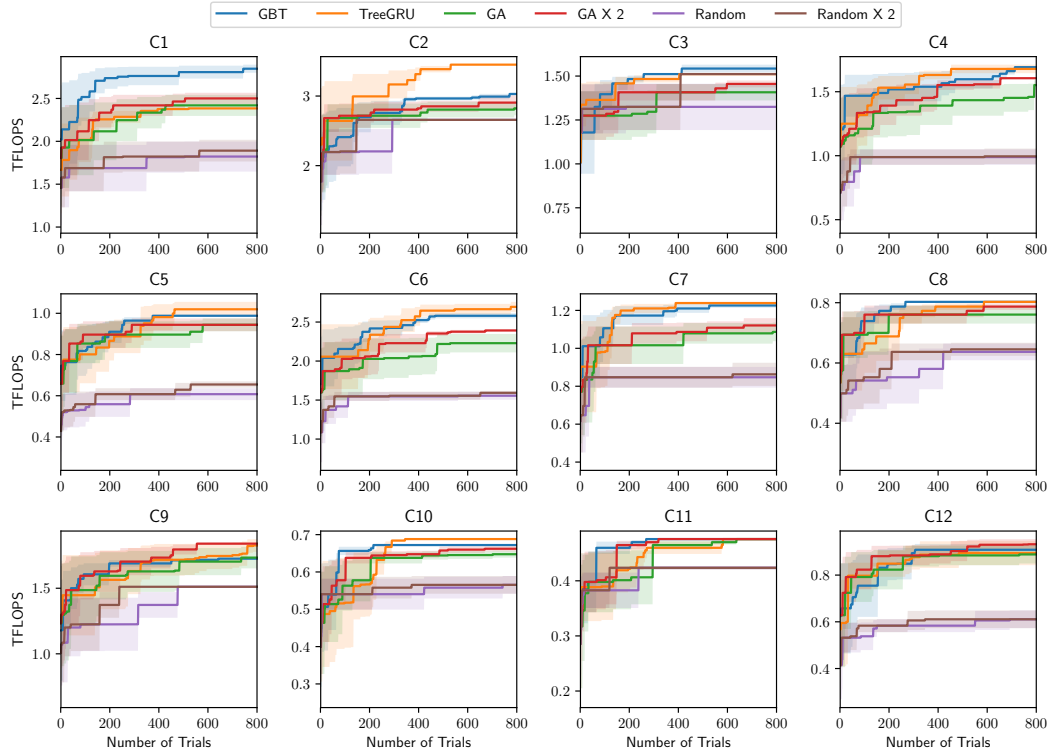

Figure 2: Effectiveness of cost model on all conv2d operators in ResNet-18.

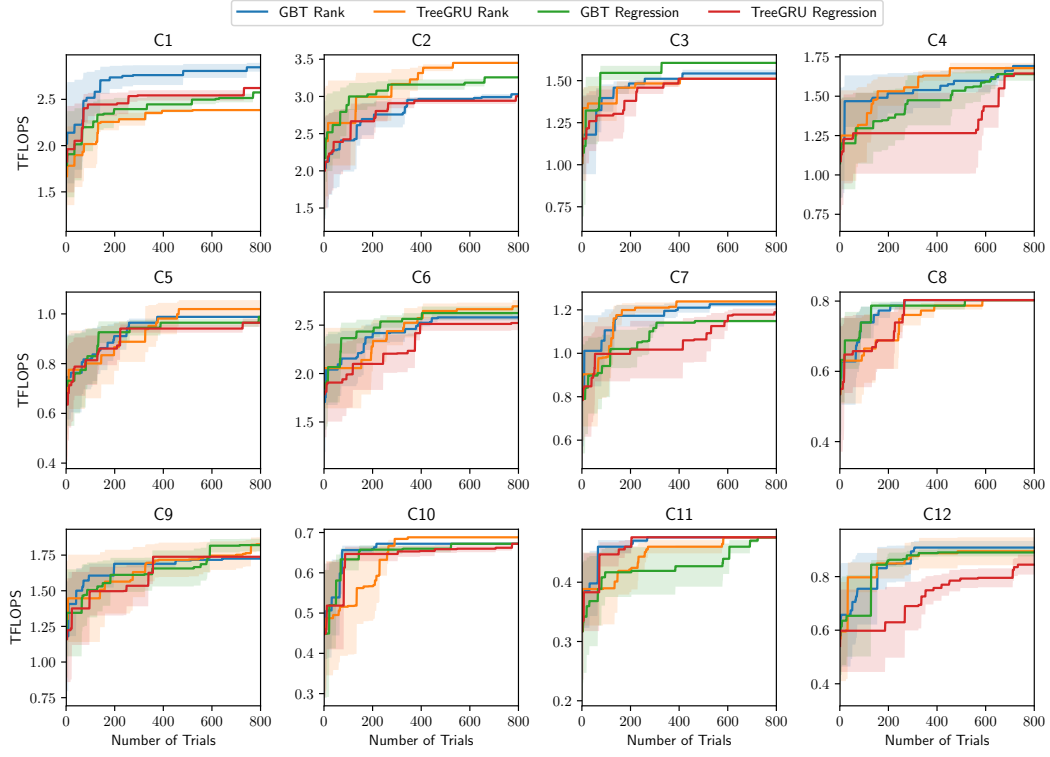

Figure 3: Impact of objective function of cost model on all conv2d operators in ResNet-18.

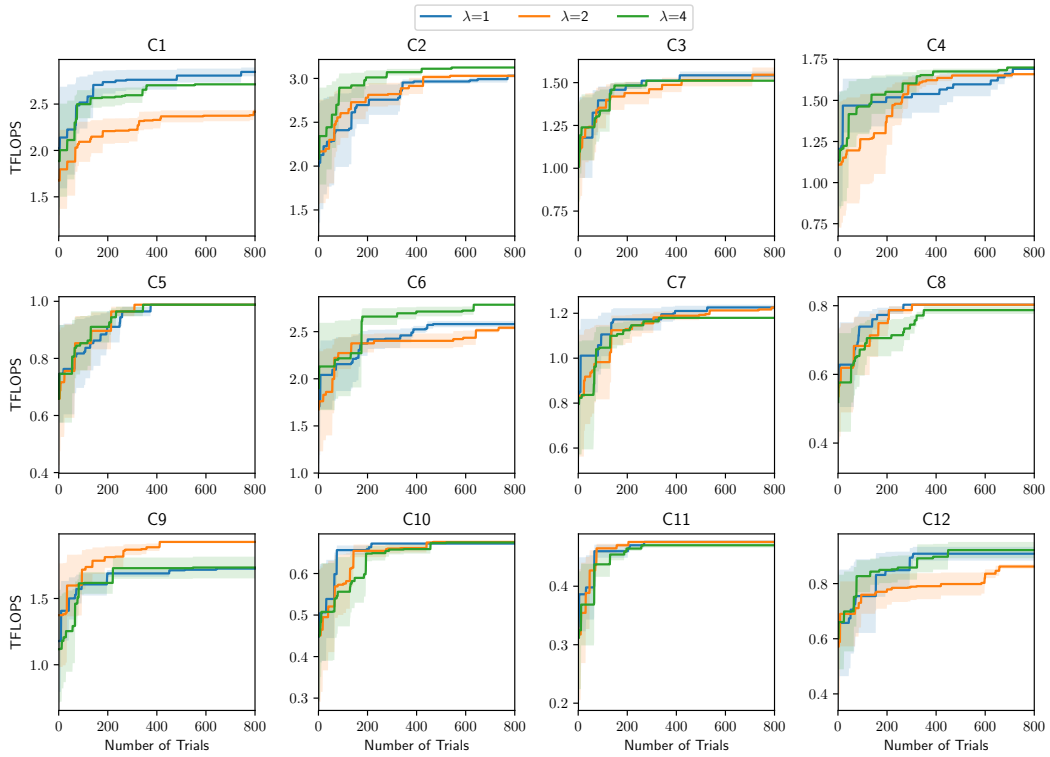

Figure 4: Impact of diversity aware exploration on all conv2d operators in ResNet-18.

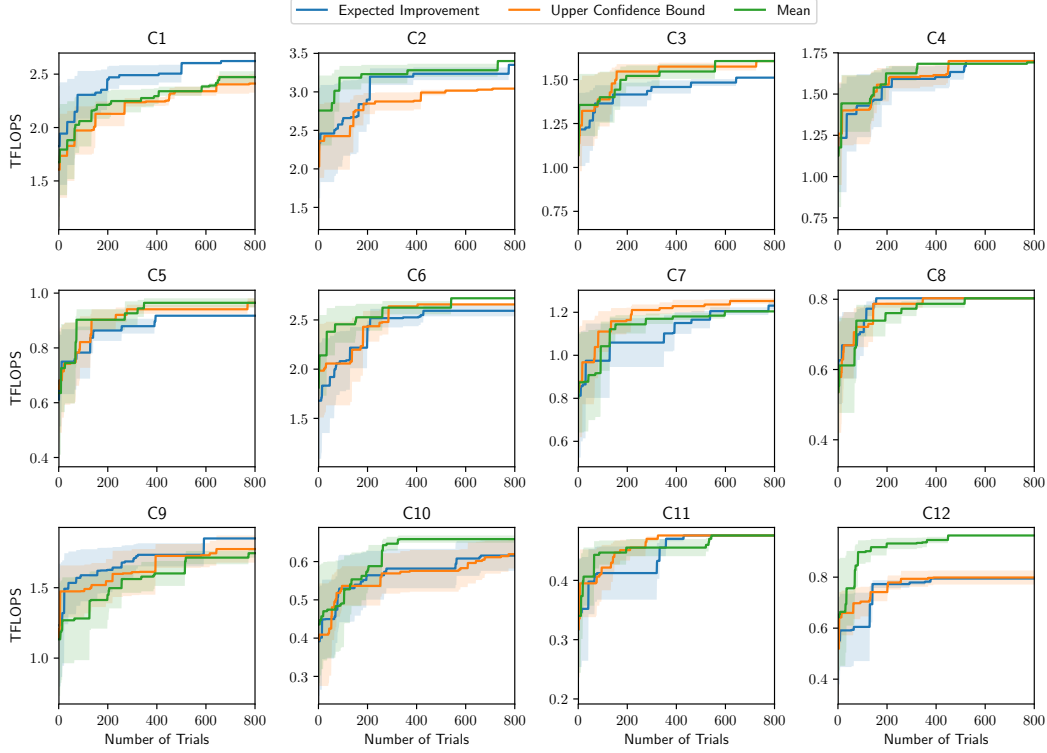

Figure 5: Impact of uncertainty aware acquisition function on all conv2d operators in ResNet-18.

## A.2 Summary of Loop Features

### A.2.1 Loop Context

We extract loop context for every loop variable. The loop context contains loop attributes and the access patterns for all touched inner buffers.

| Feature Name                         |             | Description                                                                   |
|--------------------------------------|-------------|-------------------------------------------------------------------------------|
| length                               |             | The length of this loop                                                       |
| annotation                           |             | One-hot annotation of this loop (can be vectorize, unrolled, paralleled, ...) |
| top-down                             |             | The product of the lengths of outer loops                                     |
| bottom-up                            |             | The product of the lengths of inner loops                                     |
| access pattern<br>(for every buffer) | touch count | The number of touched elements                                                |
|                                      | reuse ratio | Reuse ratio of this buffer (= bottom-up / touch count)                        |
|                                      | stride      | Coefficient of this loop variable in the index expression                     |

Table 1: Listing of loop context feature

### A.2.2 Relation Feature

First we pick the longest chain from the AST. Then we extract loop context features for the loop variables in this chain. We compute two pairs of relation : touch count vs reuse ratio and touch count vs top-down.

## A.3 Experiment Configuration

| Hyperparameter | Value | Description                                             |
|----------------|-------|---------------------------------------------------------|
| $b_{GBT}$      | 64    | batch size of planning in GBT                           |
| $b_{TreeGRU}$  | 64    | batch size of planning in TreeGRU                       |
| $emb\_dim$     | 128   | dimension of loop variable embedding in TreeGRU         |
| $hidden\_size$ | 128   | hidden size of GRU cell in TreeGRU                      |
| $n_{sa}$       | 128   | number of Markov chains in parallel simulated annealing |
| $step_{sa}$    | 500   | maximum steps of one simulated annealing run            |
